# Supplementary material for: Nonadiabatic dynamics simulation of photoinduced ring-opening reaction of 2(5H)-thiophenone with internal conversion and intersystem crossing
Source: Royal Society of Chemistry journal article supplement (doi:10.1039/d1cp00281c), 2021-01-01
Supplement: d1cp00281c1.pdf [file d1cp00281c1.pdf]

## **Supporting Information: Nonadiabatic Dynamics Simulation of Photoinduced Ring-Opening Reaction of 2(5H)-Thiophenone with Internal Conversion and Intersystem Crossing**

Bin-Bin Xie<sup>1\*</sup>, Bo-Long Liu<sup>1</sup>, Xiu-Fang Tang<sup>1</sup>, Diandong Tang<sup>2</sup>, Lin Shen<sup>2\*</sup>, and Wei-Hai Fang<sup>2</sup>

*1) Hangzhou Institute of Advanced Studies, Zhejiang Normal University, 1108 Gengwen Road, Hangzhou 311231, Zhejiang, P. R. China*

*2) Key Laboratory of Theoretical and Computational Photochemistry of Ministry of Education, College of Chemistry, Beijing Normal University, Beijing 100875, P. R. China*

---

\*Author to whom correspondence should be addressed. Email: [binbinxie@mail.bnu.edu.cn](mailto:binbinxie@mail.bnu.edu.cn); [lshen@bnu.edu.cn](mailto:lshen@bnu.edu.cn).

## **Table of Contents**

1. Additional representative trajectories from nonadiabatic dynamics simulations
2. Cartesian coordinates for critical structures optimized at the CASPT2 level

## 1. Additional representative trajectories from nonadiabatic dynamics simulations

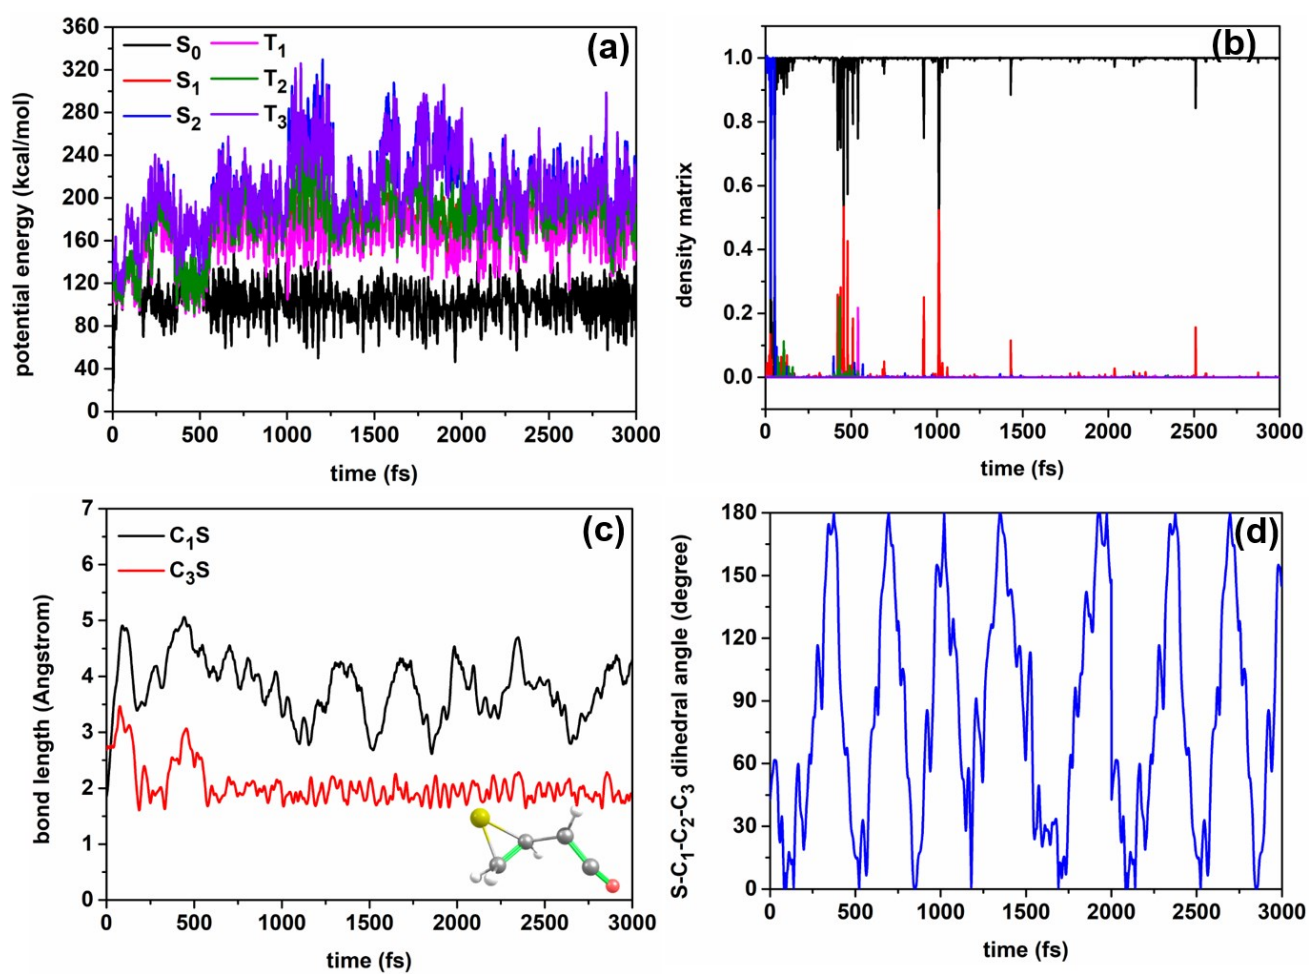

**Figure S1.** Potential energies (a), diagonal elements of density matrix (b),  $C_1$ -S and  $C_3$ -S distances (c) and S-C<sub>1</sub>-C<sub>2</sub>-C<sub>3</sub> dihedral angle (d) plotted as a function of time for a representative of type-I trajectories.

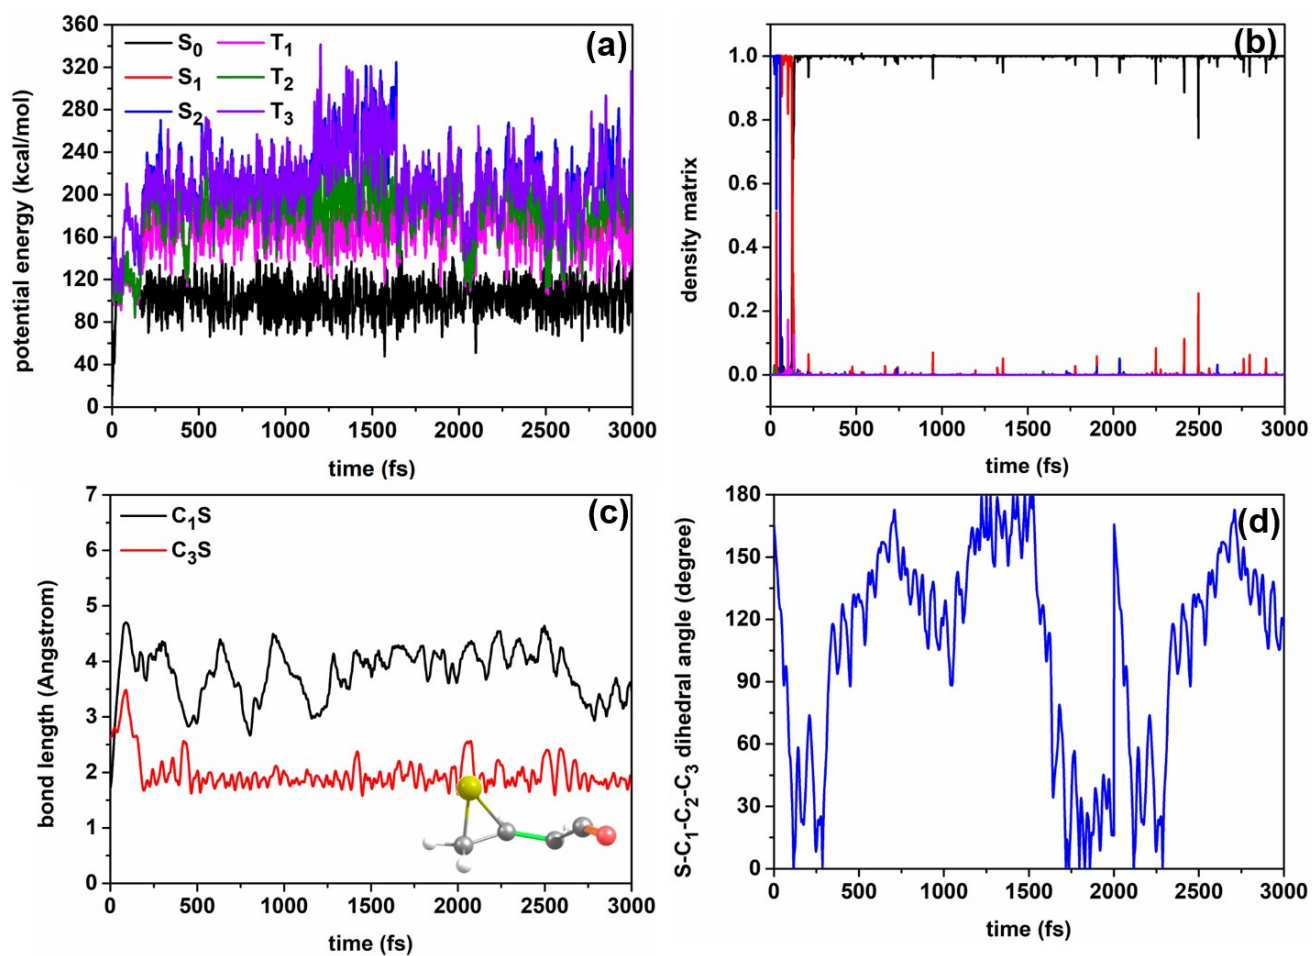

**Figure S2.** Potential energies (a), diagonal elements of density matrix (b),  $C_1-S$  and  $C_3-S$  distances (c) and  $S-C_1-C_2-C_3$  dihedral angle (d) plotted as a function of time for a representative of type-I trajectories.

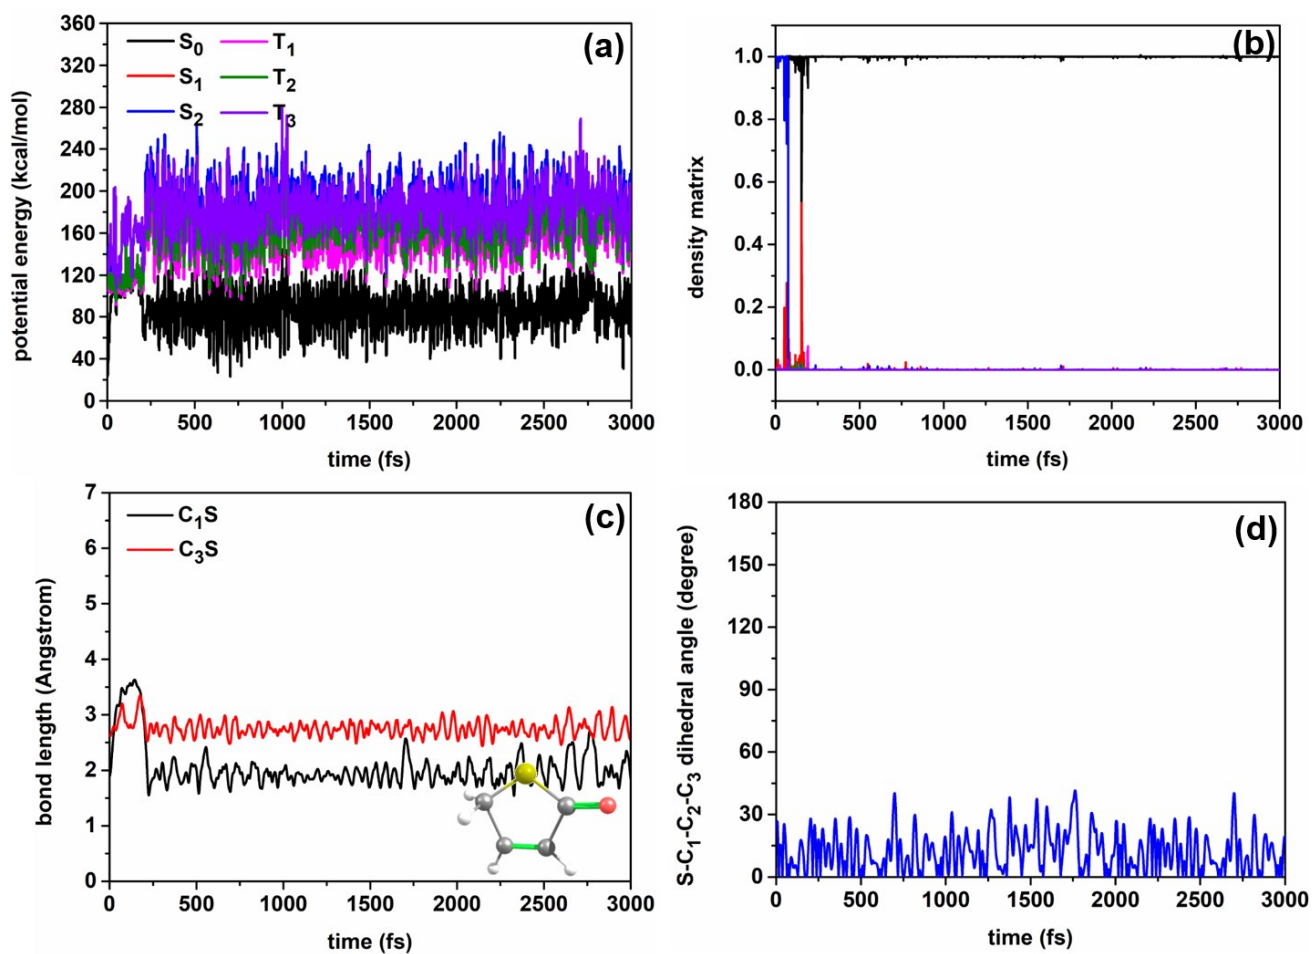

**Figure S3.** Potential energies (a), diagonal elements of density matrix (b), C<sub>1</sub>-S and C<sub>3</sub>-S distances (c) and S-C<sub>1</sub>-C<sub>2</sub>-C<sub>3</sub> dihedral angle (d) plotted as a function of time for a representative of type-II trajectories.

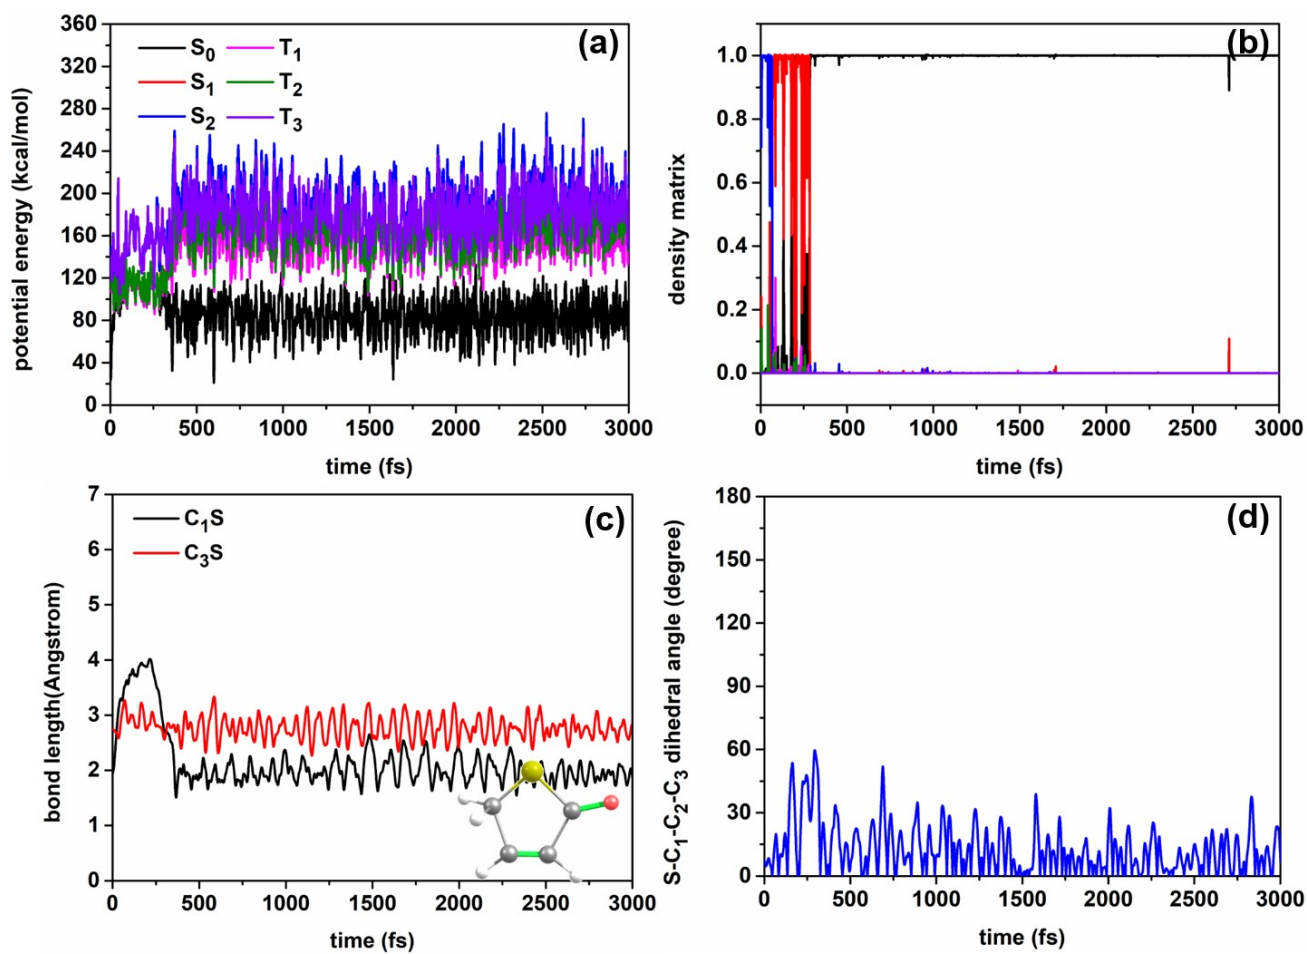

**Figure S4.** Potential energies (a), diagonal elements of density matrix (b),  $C_1-S$  and  $C_3-S$  distances (c) and S- $C_1-C_2-C_3$  dihedral angle (d) plotted as a function of time for a representative of type-II trajectories.

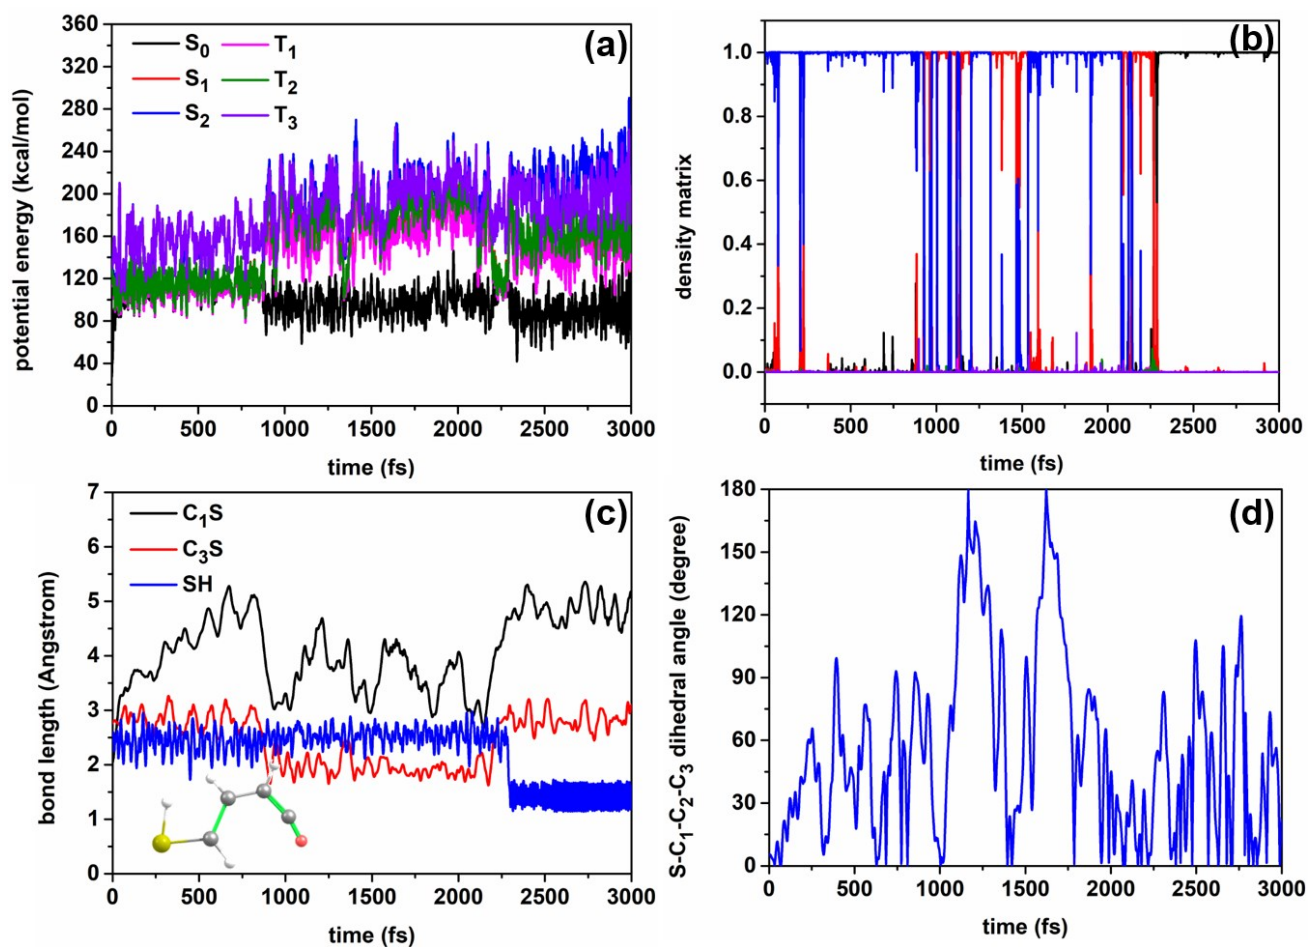

**Figure S5.** Potential energies (a), diagonal elements of density matrix (b),  $C_1-S$ ,  $C_3-S$  and  $S-H$  distances (c) and  $S-C_1-C_2-C_3$  dihedral angle (d) plotted as a function of time for one of minor trajectories leading to P3 product.

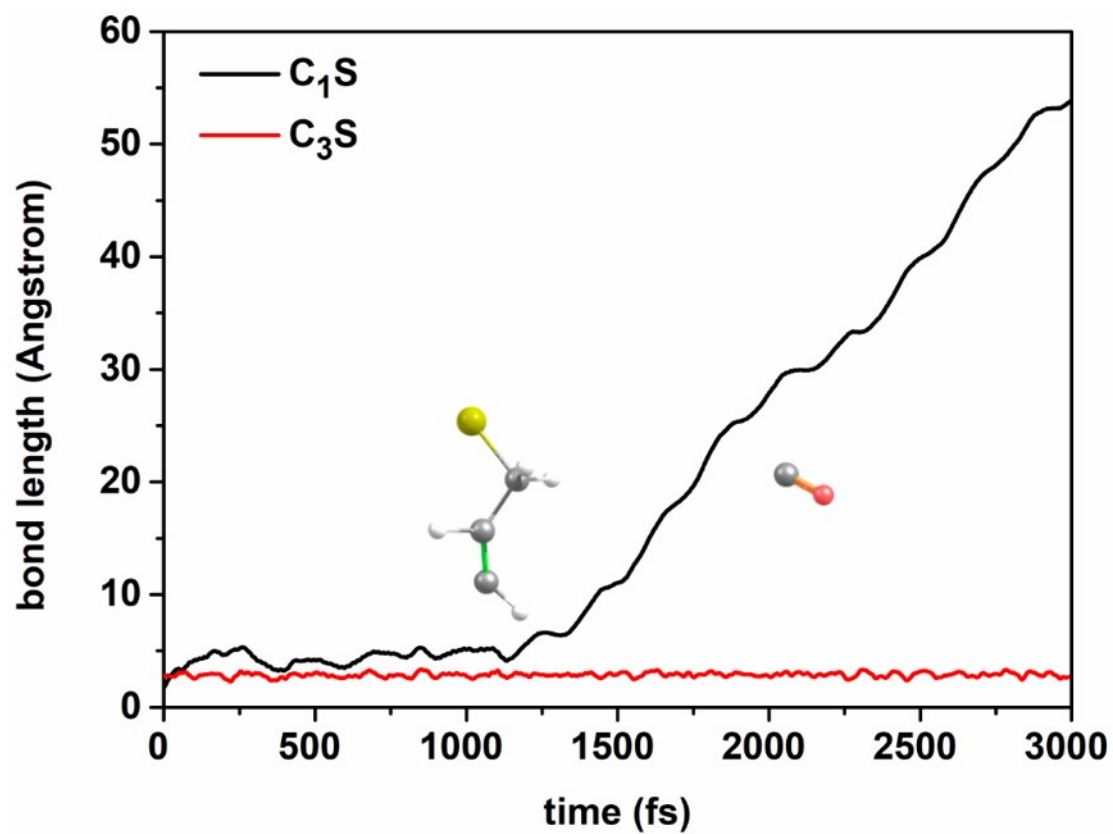

**Figure S6.** C<sub>1</sub>-S and C<sub>3</sub>-S distances plotted as a function of time for one of minor trajectories leading to CO fragment.



## 2. Cartesian coordinates for critical structures optimized at the CASPT2 level (Unit: Angstrom)

2TP-S<sub>0</sub>

|   |              |              |              |
|---|--------------|--------------|--------------|
| C | -1.594052670 | -0.221340360 | 0.000359410  |
| C | -1.143316950 | 1.214774370  | -0.000318150 |
| C | 0.191465370  | 1.418445160  | 0.000128340  |
| C | 1.016936960  | 0.179689910  | -0.002278880 |
| S | -0.102655030 | -1.260805830 | 0.000070230  |
| H | -2.206714590 | -0.440544280 | 0.893142340  |
| H | -1.884602640 | 2.020447600  | -0.000585320 |
| H | 0.692543980  | 2.389656740  | 0.001391540  |
| O | 2.229211880  | 0.114756210  | 0.000816990  |
| H | -2.206590160 | -0.441111640 | -0.892353760 |

2TP-S<sub>1</sub>

|   |              |              |              |
|---|--------------|--------------|--------------|
| C | -1.616526120 | -0.195104230 | 0.000056610  |
| C | -1.176305770 | 1.243748060  | -0.000100520 |
| C | 0.214386710  | 1.429621230  | 0.000076610  |
| C | 0.943311580  | 0.238465820  | -0.000063130 |
| S | -0.088344860 | -1.238317580 | -0.000605160 |
| H | -2.208908700 | -0.462395850 | 0.895339670  |
| H | -1.905076610 | 2.057461470  | -0.000319430 |
| H | 0.715044280  | 2.400048440  | 0.000290440  |
| O | 2.244275420  | 0.022862470  | 0.000428670  |
| H | -2.209629380 | -0.462422100 | -0.894730240 |

2TP-T<sub>1</sub>

|   |              |              |              |
|---|--------------|--------------|--------------|
| C | -1.638925260 | -0.182291550 | 0.015888210  |
| C | -1.182883020 | 1.248125230  | 0.117207390  |
| C | 0.215257740  | 1.416947970  | -0.021555290 |
| C | 0.942088780  | 0.204254240  | -0.103272500 |
| S | -0.129327870 | -1.235669230 | 0.093772080  |
| H | -2.292054030 | -0.486369080 | 0.856455560  |
| H | -1.892363120 | 2.071182530  | -0.013487550 |
| H | 0.735062380  | 2.377988480  | -0.025653230 |
| O | 2.214462950  | 0.058606190  | 0.007074240  |
| H | -2.185175560 | -0.387347780 | -0.926043920 |

2TP-T<sub>2</sub>

|   |              |              |              |
|---|--------------|--------------|--------------|
| C | -1.641831190 | -0.185563860 | 0.002625690  |
| C | -1.197125210 | 1.248952230  | -0.003382490 |
| C | 0.231048850  | 1.419431780  | 0.025311090  |
| C | 0.950337580  | 0.214083180  | -0.001419580 |
| S | -0.129725920 | -1.240255400 | -0.027338650 |
| H | -2.228602290 | -0.443527560 | 0.905696530  |
| H | -1.906356840 | 2.075121320  | -0.033641410 |
| H | 0.744326560  | 2.380152630  | 0.003176170  |
| O | 2.228022530  | 0.052198100  | 0.008250040  |
| H | -2.263951070 | -0.435166430 | -0.878892390 |

2TP-T<sub>3</sub>

|   |              |              |              |
|---|--------------|--------------|--------------|
| C | -1.638939000 | -0.163080000 | 0.010864000  |
| C | -1.189237000 | 1.257032000  | 0.032895000  |
| C | 0.225901000  | 1.432764000  | -0.025483000 |
| C | 1.018583000  | 0.272754000  | -0.029758000 |
| S | -0.184532000 | -1.260241000 | 0.050173000  |
| H | -2.288348000 | -0.469766000 | 0.860916000  |
| H | -1.904179000 | 2.072598000  | 0.029998000  |
| H | 0.710811000  | 2.395989000  | -0.019364000 |
| O | 2.243264000  | -0.002108000 | -0.001391000 |
| H | -2.207181000 | -0.450516000 | -0.908465000 |

## PI

|   |              |              |              |
|---|--------------|--------------|--------------|
| C | 28.093744550 | 28.486091730 | 25.142131600 |
| C | 28.032476120 | 27.278928830 | 25.715766370 |
| C | 26.818845770 | 26.825565420 | 26.463409150 |
| C | 26.668938780 | 27.149674730 | 27.918314280 |
| S | 25.514738340 | 28.068957800 | 26.828772490 |
| H | 28.912195450 | 26.634432380 | 25.625183920 |
| H | 26.417053660 | 25.854212070 | 26.146982450 |
| H | 26.195828150 | 26.406964680 | 28.570823960 |
| O | 28.172652140 | 29.538132850 | 24.626174320 |
| H | 27.457490570 | 27.758082210 | 28.374033430 |

## P2

|   |              |              |              |
|---|--------------|--------------|--------------|
| C | 28.089774940 | 28.295146410 | 25.641774390 |
| C | 27.181278990 | 27.350420520 | 25.886272160 |
| C | 27.000994100 | 26.757978730 | 27.259683810 |
| C | 25.617581850 | 26.906088800 | 27.853455400 |
| S | 24.310618420 | 27.587260890 | 27.143282050 |
| H | 26.532316250 | 27.064631010 | 25.055469470 |
| H | 27.227301080 | 25.671835060 | 27.253724880 |
| H | 25.526343050 | 26.478755460 | 28.867124750 |
| O | 28.905305110 | 29.118115480 | 25.430640480 |
| H | 27.722272420 | 27.196607220 | 27.975405050 |

## P3

|   |              |              |              |
|---|--------------|--------------|--------------|
| C | 28.313533950 | 28.003758520 | 25.499228330 |
| C | 28.150700870 | 26.683751880 | 25.715631890 |
| C | 27.223230370 | 26.025605730 | 26.632780760 |
| C | 26.330034690 | 26.588898570 | 27.490548000 |
| S | 26.039030690 | 28.340103390 | 27.518546750 |
| H | 28.833052280 | 26.072510210 | 25.115919810 |
| H | 27.274471230 | 24.931282030 | 26.612353430 |
| H | 25.705505000 | 25.954783290 | 28.126410910 |
| O | 28.551973120 | 29.111058800 | 25.194733460 |
| H | 26.261540340 | 28.522463370 | 28.837958820 |

Br-S<sub>0</sub>

|   |              |              |              |
|---|--------------|--------------|--------------|
| C | -1.573437390 | -0.698364840 | 0.387324470  |
| C | -0.140174680 | -0.400979840 | 0.710390350  |
| C | 0.464686350  | 0.786189810  | 0.447047950  |
| C | 1.897733240  | 0.968774400  | 0.801569890  |
| S | -1.749734270 | -2.090839870 | -0.769164780 |
| H | -2.112830040 | -1.031273570 | 1.297878520  |
| H | 0.447840830  | -1.206084400 | 1.166377670  |
| H | -0.071716440 | 1.622050530  | -0.024379870 |
| O | 2.559281530  | 1.962291850  | 0.658146330  |
| H | -2.103946910 | 0.189863190  | 0.003110620  |

2TP-T<sub>3</sub>/T<sub>2</sub>

|   |              |              |              |
|---|--------------|--------------|--------------|
| C | -1.612768879 | -0.187719789 | 0.001602547  |
| C | -1.190641709 | 1.242845683  | 0.002766739  |
| C | 0.245287812  | 1.429519975  | -0.002303829 |
| C | 1.061894809  | 0.269231247  | -0.005476788 |
| S | -0.193887135 | -1.290475925 | -0.000281712 |
| H | -2.242115841 | -0.479131770 | 0.876755217  |
| H | -1.922564312 | 2.050405361  | -0.002945626 |
| H | 0.732882211  | 2.407779033  | 0.003256544  |
| O | 2.274531572  | 0.070155904  | 0.002482160  |
| H | -2.240411134 | -0.478654574 | -0.875465189 |

Br-S<sub>2</sub>/S<sub>1</sub>/S<sub>0</sub>

|   |              |              |              |
|---|--------------|--------------|--------------|
| C | -1.646777974 | -0.254680605 | -0.049012106 |
| C | -1.116816163 | 1.135985874  | 0.162728917  |
| C | 0.249353260  | 1.471703669  | 0.011398386  |
| C | 1.283039260  | 0.602461380  | -0.212497905 |
| S | -0.604122247 | -1.523598015 | 0.767808380  |
| H | -2.640338415 | -0.327207041 | 0.431169209  |
| H | -1.813655454 | 1.952319201  | 0.361249641  |
| H | 0.588757054  | 2.507541177  | 0.148205652  |
| O | 2.242921293  | -0.023729534 | -0.489433050 |
| H | -1.756228448 | -0.455371268 | -1.131233009 |

Br- S<sub>2</sub>/S<sub>1</sub>/S<sub>0</sub>/T<sub>1</sub>/T<sub>2</sub>

|   |              |              |              |
|---|--------------|--------------|--------------|
| C | -1.628532880 | -0.246960118 | -0.044149822 |
| C | -1.113855382 | 1.149393521  | 0.157795621  |
| C | 0.253223010  | 1.488724433  | 0.018630277  |
| C | 1.275671364  | 0.602837073  | -0.213371916 |
| S | -0.657394647 | -1.527079547 | 0.839325260  |
| H | -2.653271687 | -0.311721305 | 0.360721608  |
| H | -1.814711292 | 1.955555153  | 0.393113166  |
| H | 0.590012398  | 2.520609437  | 0.190135693  |
| O | 2.200210181  | -0.027034565 | -0.583655822 |
| H | -1.665236494 | -0.518857798 | -1.118153001 |

Br-S<sub>2</sub>/T<sub>3</sub>

|   |              |              |              |
|---|--------------|--------------|--------------|
| C | -1.660085614 | -0.238418294 | -0.027493372 |
| C | -1.094234228 | 1.140049129  | 0.159213621  |
| C | 0.255120458  | 1.445259224  | 0.020412415  |
| C | 1.254397372  | 0.485507383  | -0.260399627 |
| S | -0.772461654 | -1.613241263 | 0.805436370  |
| H | -2.666253102 | -0.303276367 | 0.420017629  |
| H | -1.807849151 | 1.941263875  | 0.363573213  |
| H | 0.635060229  | 2.472068874  | 0.128271798  |
| O | 2.395725552  | 0.232759717  | -0.506222848 |
| H | -1.753257911 | -0.476539849 | -1.102417697 |

2TP-S<sub>1</sub>/T<sub>1</sub>/T<sub>2</sub>

|   |              |              |              |
|---|--------------|--------------|--------------|
| C | -1.618997158 | -0.198249669 | 0.000076331  |
| C | -1.183310162 | 1.240788266  | -0.000424224 |
| C | 0.224265698  | 1.425249773  | 0.000208126  |
| C | 0.953800865  | 0.233247874  | 0.000228086  |
| S | -0.095392411 | -1.241075289 | -0.000717533 |
| H | -2.216624021 | -0.460875928 | 0.893743153  |
| H | -1.909152805 | 2.056119898  | -0.000199081 |
| H | 0.727672145  | 2.394067554  | 0.000277748  |
| O | 2.247263686  | 0.045773587  | 0.000274940  |
| H | -2.217297404 | -0.461074134 | -0.893084622 |

2TP-S<sub>2</sub>/T<sub>2</sub>/T<sub>3</sub>

|   |              |              |              |
|---|--------------|--------------|--------------|
| C | -1.648283535 | -0.207920175 | -0.000118016 |
| C | -1.179038376 | 1.217814511  | -0.000308749 |
| C | 0.248751474  | 1.424357958  | 0.000875230  |
| C | 1.098244973  | 0.305468910  | 0.000693098  |
| S | -0.190870079 | -1.294684167 | -0.001064635 |
| H | -2.263569715 | -0.468252346 | 0.887189284  |
| H | -1.896329855 | 2.040101658  | -0.000226976 |
| H | 0.709244316  | 2.416751443  | -0.000614380 |
| O | 2.298980409  | 0.068269166  | 0.000427305  |
| H | -2.264912314 | -0.467942119 | -0.886479174 |
